# Supplementary material for: STRONG: metagenomics strain resolution on assembly graphs
Source: PubMed Central journal article supplement (PMC8311964; doi:10.1186/s13059-021-02419-7), 2021-07-26
Supplement: 13059_2021_2419_MOESM1_ESM.pdf [file 13059_2021_2419_MOESM1_ESM.pdf]

## Supporting information

### Supplementary tables

| Species name                        | Tax. ID. | Strain ID | No. contigs | Genbank Accn no. |
|-------------------------------------|----------|-----------|-------------|------------------|
| <i>Pseudomonas chlororaphis</i>     | 587753   | 1037915   | 1           | GCF'000264555.1  |
| <i>Pseudomonas chlororaphis</i>     | 587753   | 86192     | 1           | GCF'000761195.1  |
| <i>Pseudomonas chlororaphis</i>     | 587753   | 587753    | 1           | GCF'000698865.1  |
| <i>Pseudomonas chlororaphis</i>     | 587753   | 1038921   | 1           | GCF'000281915.1  |
| <i>Bordetella holmesii</i>          | 35814    | 1247648   | 4           | GCF'000598125.1  |
| <i>Bordetella holmesii</i>          | 35814    | 1172205   | 1           | GCF'000765395.1  |
| <i>Bordetella holmesii</i>          | 35814    | 1247646   | 4           | GCF'000572015.1  |
| <i>Bordetella holmesii</i>          | 35814    | 1266729   | 2           | GCF'000341465.1  |
| <i>Comamonas testosteroni</i>       | 285      | 399795    | 1           | GCF'000168855.1  |
| <i>Comamonas testosteroni</i>       | 285      | 1392005   | 1           | GCF'000739375.1  |
| <i>Acetobacter pasteurianus</i>     | 438      | 438       | 1           | GCF'001183745.1  |
| <i>Rhodococcus erythropolis</i>     | 1833     | 234621    | 4           | GCF'000010105.1  |
| <i>Rhodococcus erythropolis</i>     | 1833     | 1136179   | 2           | GCF'000454045.1  |
| <i>Rhodococcus erythropolis</i>     | 1833     | 1289591   | 3           | GCF'000696675.1  |
| <i>Rickettsia prowazekii</i>        | 782      | 272947    | 1           | GCF'000195735.1  |
| <i>Clostridium sporogenes</i>       | 1509     | 1509      | 1           | GCF'001020205.1  |
| <i>Clostridium sporogenes</i>       | 1509     | 471871    | 2           | GCF'000155085.1  |
| <i>Mycoplasma capricolum</i>        | 2095     | 1124992   | 1           | GCF'000835085.1  |
| <i>Mycoplasma capricolum</i>        | 2095     | 40480     | 1           | GCF'000953375.1  |
| <i>Achromobacter xylooxidans</i>    | 85698    | 1167634   | 1           | GCF'000967095.2  |
| <i>Achromobacter xylooxidans</i>    | 85698    | 562971    | 1           | GCF'000758265.1  |
| <i>Sinorhizobium meliloti</i>       | 382      | 1230587   | 4           | GCF'000304415.1  |
| <i>Sinorhizobium meliloti</i>       | 382      | 698936    | 3           | GCF'000147775.2  |
| <i>Mycoplasma gallisepticum</i>     | 2096     | 1159201   | 1           | GCF'000286755.1  |
| <i>Mycoplasma gallisepticum</i>     | 2096     | 710128    | 1           | GCF'000025365.1  |
| <i>Mycoplasma gallisepticum</i>     | 2096     | 708616    | 1           | GCF'000025385.1  |
| <i>Riemerella anatipestifer</i>     | 34085    | 1228997   | 1           | GCF'000295655.1  |
| <i>Riemerella anatipestifer</i>     | 34085    | 1271752   | 1           | GCF'000331695.1  |
| <i>Riemerella anatipestifer</i>     | 34085    | 693978    | 1           | GCF'000183155.1  |
| <i>Riemerella anatipestifer</i>     | 34085    | 1455062   | 1           | GCF'001077795.1  |
| <i>Riemerella anatipestifer</i>     | 34085    | 992406    | 1           | GCF'000191565.1  |
| <i>Leuconostoc mesenteroides</i>    | 1245     | 33966     | 2           | GCF'001047695.1  |
| <i>Bacillus atrophaeus</i>          | 1452     | 720555    | 1           | GCF'000165925.1  |
| <i>Bacillus atrophaeus</i>          | 1452     | 1239783   | 1           | GCF'000385965.2  |
| <i>Lactobacillus fermentum</i>      | 1613     | 1381124   | 2           | GCF'000466785.3  |
| <i>Anaplasma phagocytophilum</i>    | 948      | 1184254   | 1           | GCF'000439795.1  |
| <i>Borrelia garinii</i>             | 29519    | 1081646   | 3           | GCF'000239475.1  |
| <i>Borrelia garinii</i>             | 29519    | 1421551   | 1           | GCF'000691545.1  |
| <i>Borrelia garinii</i>             | 29519    | 1234596   | 1           | GCF'000300045.1  |
| <i>Flavobacterium psychrophilum</i> | 96345    | 96345     | 1           | GCF'000739395.1  |
| <i>Flavobacterium psychrophilum</i> | 96345    | 96345     | 1           | GCF'000971645.1  |
| <i>Flavobacterium psychrophilum</i> | 96345    | 1452724   | 1           | GCF'000754405.1  |
| <i>Coxiella burnetii</i>            | 777      | 227377    | 2           | GCF'000007765.1  |
| <i>Coxiella burnetii</i>            | 777      | 434924    | 2           | GCF'000019885.1  |
| <i>Coxiella burnetii</i>            | 777      | 360115    | 2           | GCF'000018745.1  |
| <i>Bradyrhizobium japonicum</i>     | 375      | 375       | 1           | GCF'000807315.1  |
| <i>Salinispora tropica</i>          | 168695   | 369723    | 1           | GCF'000016425.1  |
| <i>Brucella ovis</i>                | 236      | 444178    | 2           | GCF'000016845.1  |
| <i>Agrobacterium tumefaciens</i>    | 358      | 1435057   | 4           | GCF'000576515.1  |
| <i>Neorhizobium galegae</i>         | 399      | 1028801   | 3           | GCF'000731295.1  |

Table S1: Genomes used in the synthetic communities (part I).

| Species name                    | Tax. ID. | Strain ID | No. contigs | Genbank Accn no. |
|---------------------------------|----------|-----------|-------------|------------------|
| Lactobacillus jensenii          | 109790   | 575606    | 4           | GCF'000161895.2  |
| Corynebacterium glutamicum      | 1718     | 1079988   | 2           | GCF'000233355.2  |
| Haloferax mediterranei          | 2252     | 523841    | 4           | GCF'000306765.2  |
| Haloferax mediterranei          | 2252     | 523841    | 4           | GCF'000685635.1  |
| Haemophilus parainfluenzae      | 729      | 862965    | 1           | GCF'000210895.1  |
| Streptococcus dysgalactiae      | 1334     | 617121    | 1           | GCF'000307185.1  |
| Lactobacillus salivarius        | 1624     | 712961    | 4           | GCF'000143435.1  |
| Yersinia frederiksenii          | 29484    | 1454377   | 2           | GCF'000834215.1  |
| Edwardsiella tarda              | 636      | 498217    | 2           | GCF'000020865.1  |
| Bacillus pumilus                | 1408     | 315750    | 1           | GCF'000017885.1  |
| Bacillus licheniformis          | 1402     | 1402      | 1           | GCF'000876525.1  |
| Bacillus licheniformis          | 1402     | 1402      | 4           | GCF'000948275.1  |
| Saccharolobus solfataricus      | 2287     | 2287      | 1           | GCF'000968435.1  |
| Morganella morganii             | 582      | 1124991   | 1           | GCF'000286435.2  |
| Ralstonia solanacearum          | 305      | 859656    | 1           | GCF'000197855.1  |
| Ralstonia solanacearum          | 305      | 1031711   | 2           | GCF'000215325.1  |
| Ralstonia solanacearum          | 305      | 305       | 1           | GCF'001373335.1  |
| Ralstonia solanacearum          | 305      | 305       | 2           | GCF'001299555.1  |
| Ralstonia solanacearum          | 305      | 305       | 1           | GCF'001373255.1  |
| Pantoea ananatis                | 553      | 706191    | 1           | GCF'000025405.2  |
| Pantoea ananatis                | 553      | 932677    | 2           | GCF'000270125.1  |
| Pantoea ananatis                | 553      | 1123863   | 2           | GCF'000283875.1  |
| Pantoea ananatis                | 553      | 1095774   | 2           | GCF'000233595.1  |
| Bartonella bacilliformis        | 774      | 1293904   | 4           | GCF'000709855.1  |
| Bartonella bacilliformis        | 774      | 1293906   | 3           | GCF'000709775.1  |
| Bartonella bacilliformis        | 774      | 1293907   | 4           | GCF'000709875.1  |
| Bartonella bacilliformis        | 774      | 1293910   | 4           | GCF'000709755.1  |
| Actinobacillus pleuropneumoniae | 715      | 537457    | 4           | GCF'000020405.1  |
| Actinobacillus pleuropneumoniae | 715      | 416269    | 1           | GCF'000015885.1  |
| Sulfolobus islandicus           | 43080    | 429572    | 1           | GCF'000022385.1  |
| Sulfolobus islandicus           | 43080    | 1132501   | 1           | GCF'000245175.1  |
| Sulfolobus islandicus           | 43080    | 427317    | 1           | GCF'000022405.1  |
| Sulfolobus islandicus           | 43080    | 930943    | 1           | GCF'000189575.1  |
| Streptococcus thermophilus      | 1308     | 1308      | 1           | GCF'000971665.1  |
| Streptococcus thermophilus      | 1308     | 264199    | 1           | GCF'000011825.1  |
| Streptococcus thermophilus      | 1308     | 1187956   | 1           | GCF'000262675.1  |
| Streptococcus thermophilus      | 1308     | 1308      | 1           | GCF'001008015.1  |
| Streptococcus thermophilus      | 1308     | 767463    | 1           | GCF'000182875.1  |
| Methanosarcina barkeri          | 2208     | 1434109   | 2           | GCF'000969985.1  |
| Methanosarcina barkeri          | 2208     | 796385    | 1           | GCF'001027005.1  |
| Methanosarcina mazei            | 2209     | 1434114   | 1           | GCF'000970225.1  |
| Methanosarcina mazei            | 2209     | 1434115   | 1           | GCF'000970185.1  |
| Methanosarcina mazei            | 2209     | 213585    | 1           | GCF'000970205.1  |
| Methanosarcina mazei            | 2209     | 1434117   | 1           | GCF'000970165.1  |
| Methanosarcina mazei            | 2209     | 192952    | 1           | GCF'000007065.1  |
| Bifidobacterium bifidum         | 1681     | 702459    | 1           | GCF'000165905.1  |
| Bifidobacterium bifidum         | 1681     | 883062    | 1           | GCF'000164965.1  |
| Bifidobacterium bifidum         | 1681     | 1681      | 2           | GCF'001020375.1  |
| Bifidobacterium bifidum         | 1681     | 500634    | 1           | GCF'001025135.1  |
| Bifidobacterium bifidum         | 1681     | 398513    | 1           | GCF'000273525.1  |

Table S2: Genomes used in the synthetic communities (part II).

| Data set       | Synth_03 | Synth_05 | Synth_10 | Synth_15 | AD     |
|----------------|----------|----------|----------|----------|--------|
| Size (Gbp)     | 45       | 45       | 45       | 45       | 116.3  |
| No. of samples | 3        | 5        | 10       | 15       | 10     |
| No. of MAGs    | 34       | 37       | 39       | 40       | 304    |
| Assembly       | 16.92    | 15.63    | 14.50    | 9.98     | 49.93  |
| Binning        | 0.03     | 0.90     | 0.60     | 0.03     | 77.30  |
| Subgraphs      | 0.60     | 1.58     | 0.90     | 0.93     | 35.05  |
| BayesPaths     | 27.43    | 35.1     | 36.82    | 19.4     | 228.65 |

Table S3: **Approximate STRONG run times in hours for data sets in this study.** We give time in hours for the major steps of the STRONG pipeline. These were run using 64 cores of a 192 core Linux x86\_64 server running Intel(R) Xeon(R) CPUs E7-8850 v2 @ 2.30GHz.

| Method | Data set       | MAGs | $\langle CV \rangle$ | #SCGs  | #fSCGs | Found | Not F. | Rep. | Err     | $R^2$       | $f^G$       |
|--------|----------------|------|----------------------|--------|--------|-------|--------|------|---------|-------------|-------------|
| STRONG | Synth_T1.S10   | 8    | 1.45                 | 31.875 | 25.375 | 27    | 8      | —    | 0.00078 | 0.99 (0.99) | 1/8 = 0.125 |
| STRONG | Synth_T10.S10  | 10   | 0.65                 | 31.1   | 24.1   | 35    | 10     | 2    | 0.086   | 0.95 (0.99) | 4/10 = 0.4  |
| STRONG | Synth_T100.S10 | 8    | 0.23                 | 32.5   | 27.625 | 27    | 8      | 4    | 0.38    | 0.97 (0.99) | 3/8 = 0.375 |

Table S4: **Impact of strain variability on STRONG reconstruction accuracy.** Results are shown for the three data sets with increasing levels of precision in strain proportions Synth\_T1.S10, Synth\_T10.S10 and Synth\_T100.S10. MAGs: The number of MAGs found.  $\langle CV \rangle$ : average strain coefficient of variation *i.e.* standard deviation of relative abundance divided by mean. #SCGs: The average number of SCGs found in each MAG. #fSCGs The average number of SCGs after filtering in STRONG. Found: Number of reference strains that had a predicted strain that best matched it. Not F.: Number of reference strains that had no predicted strain with a closest match to it. Rep.: Number of strains matching to a reference that already has a better match. Err: The average error rate of the ‘Found’ strains in percentage base pairs.  $R^2$ : Correlation between predicted and actual strain relative proportions given as adjusted  $R^2$ , the figure in parentheses is when restricted to MAGs where the number of strains was correctly predicted.  $f^G$ : the fraction of MAGs where the number of strains was correctly inferred.

| Sample         | Week | Nucleotides | Temperature | H2S  | CH4  | O2    |
|----------------|------|-------------|-------------|------|------|-------|
| AD7`W5`Repeat2 | 5    | 1.48e+10    | 38.6        | 71.6 | 55.6 | 0.616 |
| AD7`W10        | 10   | 1.34e+10    | 36.8        | 267  | 52.9 | 0.299 |
| AD7`W14        | 14   | 1.15e+10    | 39          | 111  | 63.3 | 0.499 |
| AD7`W20        | 20   | 1.02e+10    | 39.1        | 329  | 57.3 | 0.299 |
| AD7`W25        | 25   | 1.26e+10    | 39.4        | 191  | 56.6 | 0.25  |
| AD7`W27        | 27   | 1.04e+10    | 39.5        | 423  | 56.3 | 0.467 |
| AD7`W30        | 30   | 9.57e+09    | 39.7        | 268  | 58.3 | 0.71  |
| AD7`W35        | 35   | 1.52e+10    | 39.9        | 233  | 55.4 | 0.703 |
| AD7`W40        | 40   | 9.54e+09    | 39.8        | 146  | 54.4 | 0.641 |
| AD7`W45        | 45   | 9.09e+09    | 39.9        | 23.4 | 55.7 | 0.419 |

Table S5: **Anaerobic digester time series samples.**

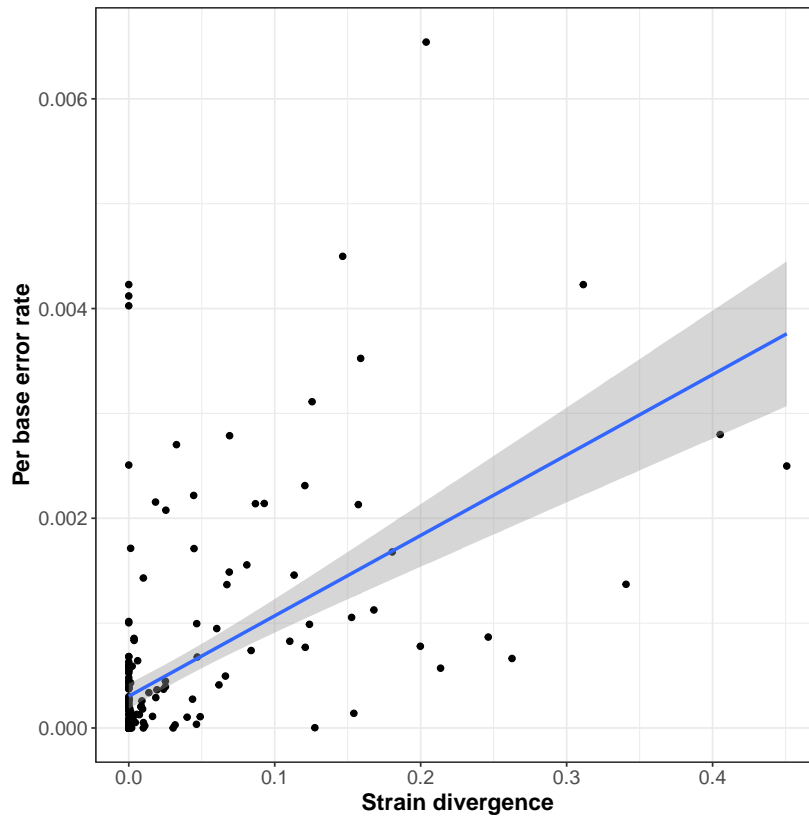

Figure S1: **Correlation between strain divergence and error rate for the synthetic community data.** For the four synthetic community data sets combined, Synth\_03, Synth\_05, Synth\_10 and Synth\_15, we show the estimated error as path divergence (see main text) against actual nucleotide error rates. The straight line is a linear regression. The error rates and divergences were correlated (Pearson’s correlation:  $r = 0.54$ ,  $p < 2.2e - 16$ ).

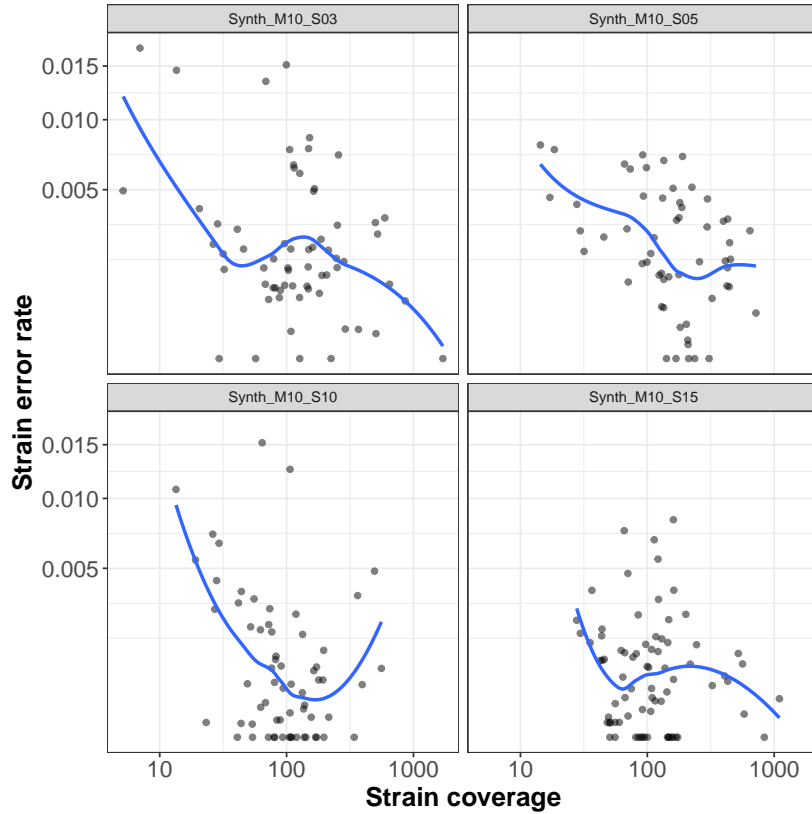

Figure S2: **Error rates in ‘Found’ strains against coverage depth for STRONG in the high diversity synthetic community data sets.** For the ‘Found’ strains we computed per base error rate to the matched reference, this is shown on the y-axis, against strain total coverage depth summed across samples on the x-axis, both axes are log transformed. The results are separated across sample number in the synthetic community.

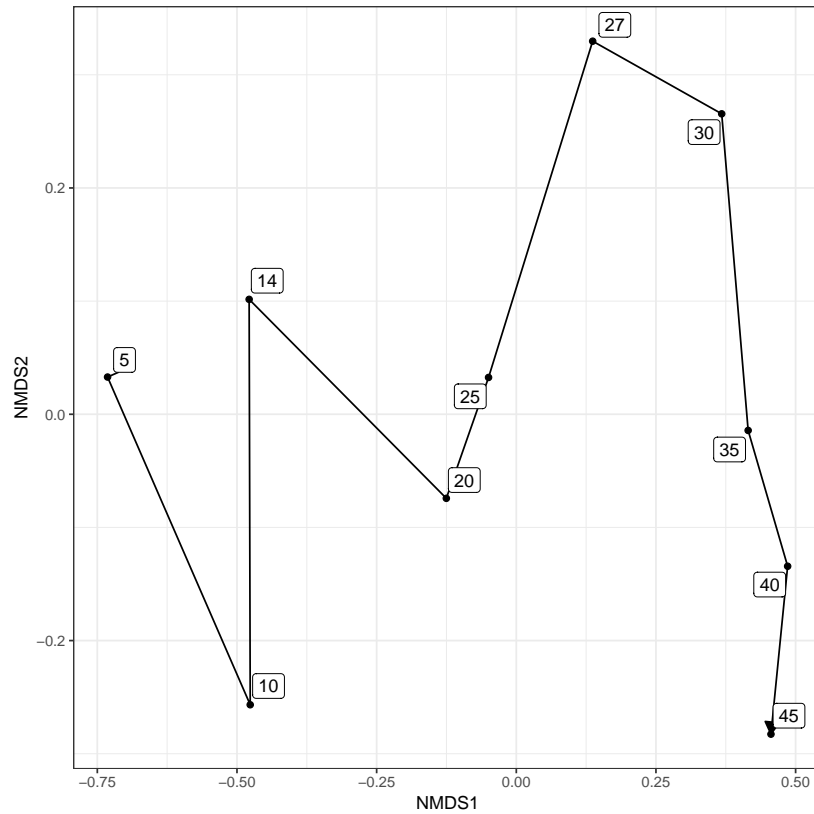

Figure S3: **NMDS plot of reactor community structure.** Bin coverages were normalised by per sample sequencing depth and Bray-Curtis distances calculated prior to NMDS, labels indicate sampling week. The sampling week had the strongest association with community structure ( $R^2 = 0.46$ ,  $p = 0.001$ ) followed by  $H_2S$  concentration ( $R^2 = 0.17$ ,  $p = 0.009$ ) and  $O_2$  ( $R^2 = 0.14$ ,  $p = 0.014$ ) based on PERMANOVA with Bray-Curtis distances (Adonis function in vegan library R). The other operating conditions, temperature and  $CH_4$ , were not significantly associated.

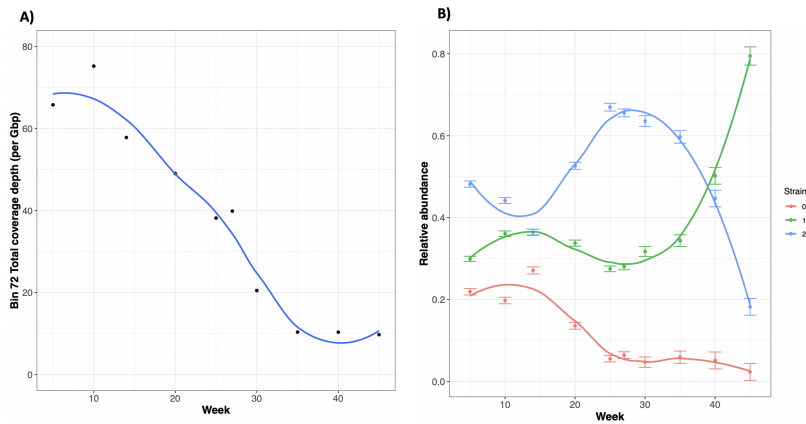

Figure S4: **Time series of A) total MAG coverage depth and B) STRONG strain abundances from Bin.72 of the AD time series.** A) Coverage depth of Bin.72 normalised by Gbp of sequence in each sample. This MAG decreased significantly in abundance over time (Pearson's correlation on log coverage  $r = -7.9$  Benjamini-Hochberg adjusted  $p = 4.9e - 05$ ). B) Strain relative proportions as calculated by BayesPaths with uncertainties as twice the standard deviation in the variational Bayesian prediction. Curves are LOESS smoothings of data points. Strain proportions did not change significantly (permutation multivariate ANOVA  $R^2 = 0.35$  adjusted  $p = 0.089$ ).



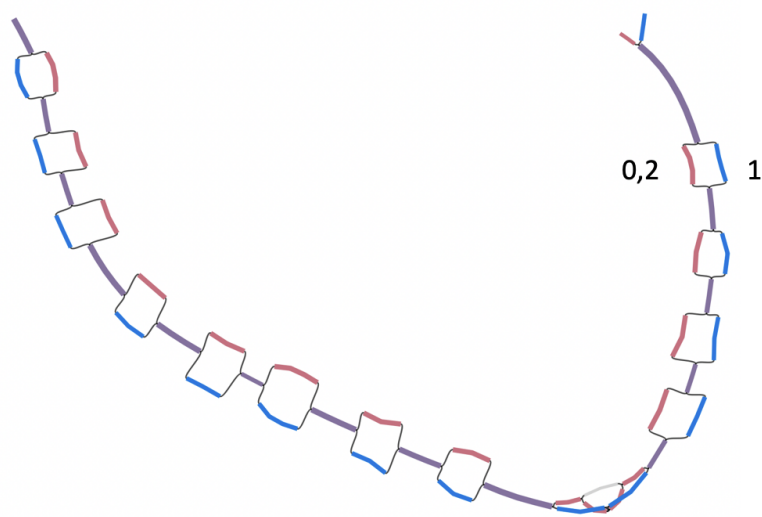

Figure S5: **Simplified variant graph for COG0532 from Bin\_72 of the AD time series.** This is a bandage plot of the high-resolution subgraph extracted for COG0532 post-simplification. The colours indicate which unitig is present in which strain (0,1 and 2). In this case strains 0 and 2 are identical for this gene.

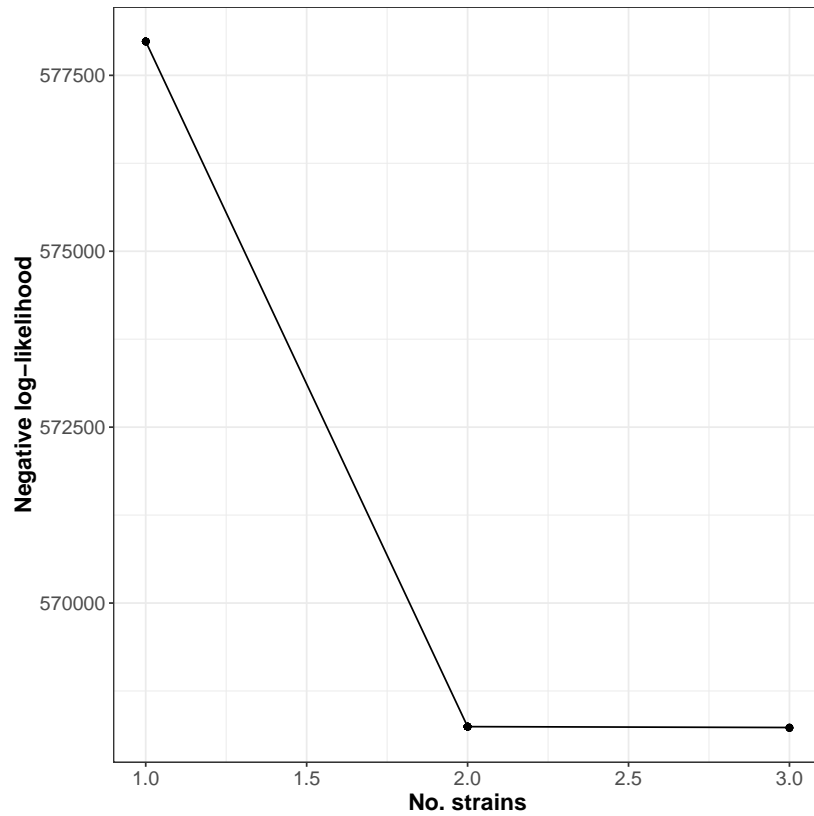

Figure S6: **Negative log-likelihood of Nanopore haplotype fits as a function of strain number for COG0532 from Bin\_72 of the AD time series data set.** The hybrid EM algorithm for Nanopore strain resolution defined in the Methods was applied to all 1,603 Nanopore reads mapping to this SCG and the negative log-likelihood computed for ten replicates at each strain number. The algorithm was run for up to 4 strains but degenerate haplotypes are collapsed and in practice no more than three strains were ever observed in this case.

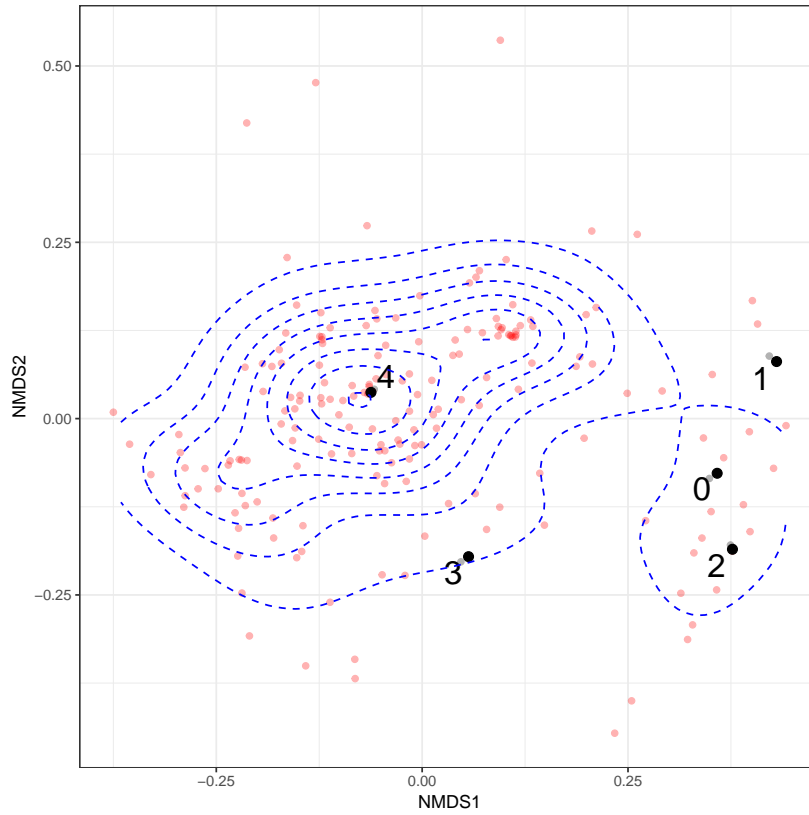

Figure S7: **Comparison of Nanopore reads to STRONG prediction for COG0072 from Bin.846.** Non-metric multidimensional scaling of Nanopore reads that mapped to COG0072 from Bin.846 of the anaerobic digester time series (red) together with the five haplotypes reconstructed from short reads by STRONG (black 0, 1, 2, 3 and 4). Distances were calculated as fractional Hamming distances on short read variant positions (see Methods). Blue dashed lines indicate read density contours. In this sample (Week 27) the short read haplotypes were predicted to have relative abundances  $\rho_0 = 0.043 \pm 0.012$ ,  $\rho_1 = 0.024 \pm 0.014$ ,  $\rho_2 = 0.13 \pm 0.017$ ,  $\rho_3 = 0.059 \pm 0.018$  and  $\rho_4 = 0.74 \pm 0.027$ .

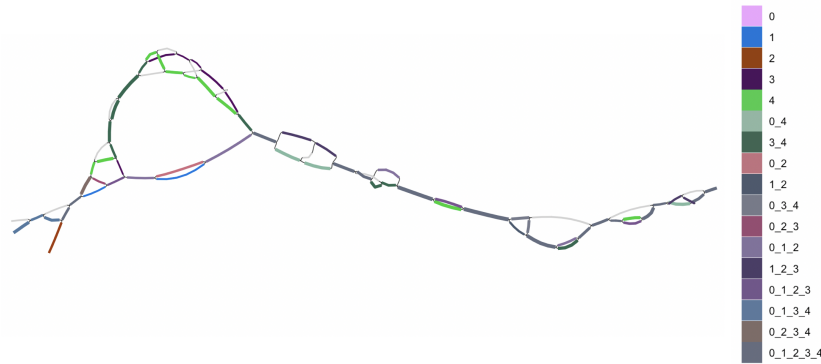

Figure S8: **Simplified variant graph for COG0072 from Bin\_846 of the AD time series.** This is a bandage plot of the high-resolution subgraph extracted for COG0072 post-simplification. The colours indicate which unitig is present in which strain (see legend).

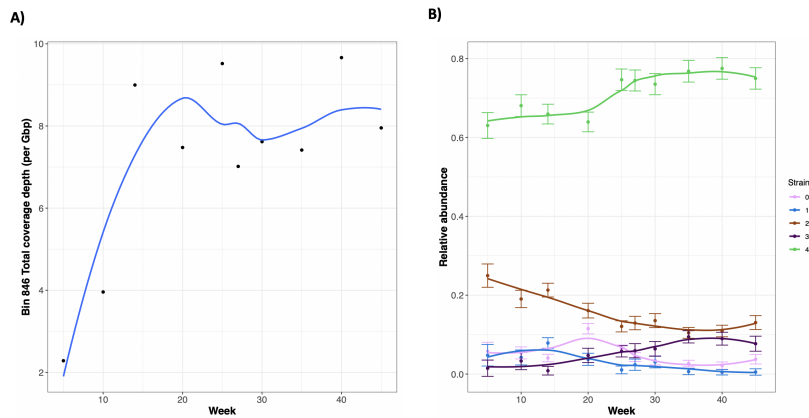

Figure S9: **Time series of A) total MAG coverage depth and B) STRONG strain abundances from Bin\_846 of the AD time series.** A) Coverage depth of Bin\_846 normalised by Gbp of sequence in each sample. This MAG increased marginally in abundance over time (Pearson's correlation on log coverage  $r = 2.6$  Benjamini-Hochberg adjusted  $p = 0.071$ ). B) Strain relative proportions as calculated by BayesPaths with uncertainties as twice the standard deviation in the variational Bayesian prediction. Curves are LOESS smoothings of data points. Strain proportions did change significantly (permutation multivariate ANOVA  $R^2 = 0.72$  adjusted  $p = 0.011$ ).

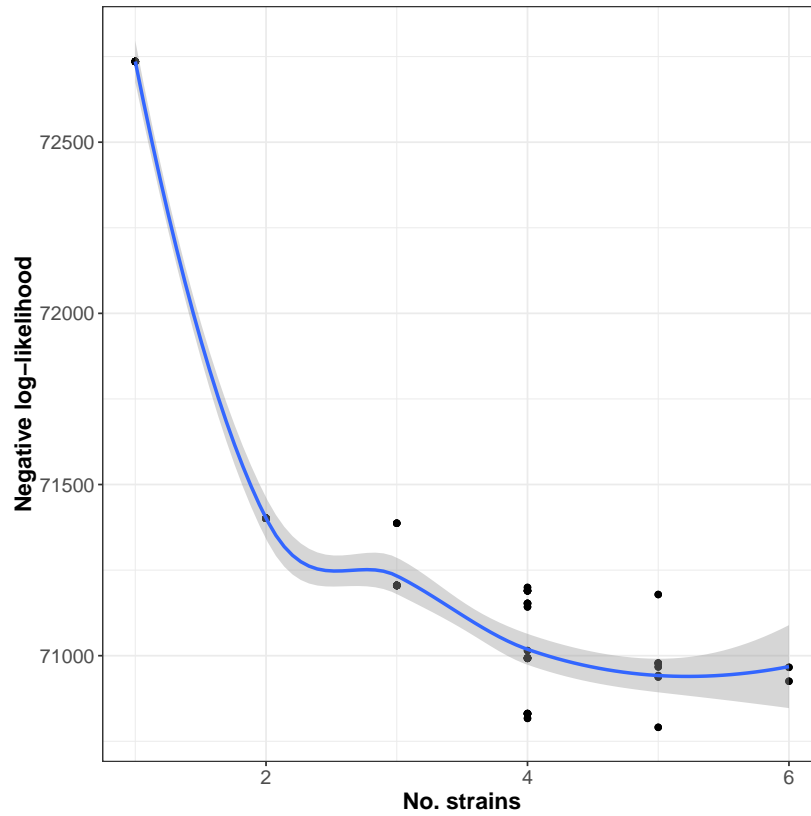

Figure S10: **Negative log-likelihood of Nanopore haplotype fits as a function of strain number for COG0072 from Bin\_846 of the AD time series.** The hybrid EM algorithm for Nanopore strain resolution defined in the Methods was applied to the 194 Nanopore reads mapping to this SCG and the negative log-likelihood computed for ten replicates at each strain number. The algorithm was run for up to 6 strains.

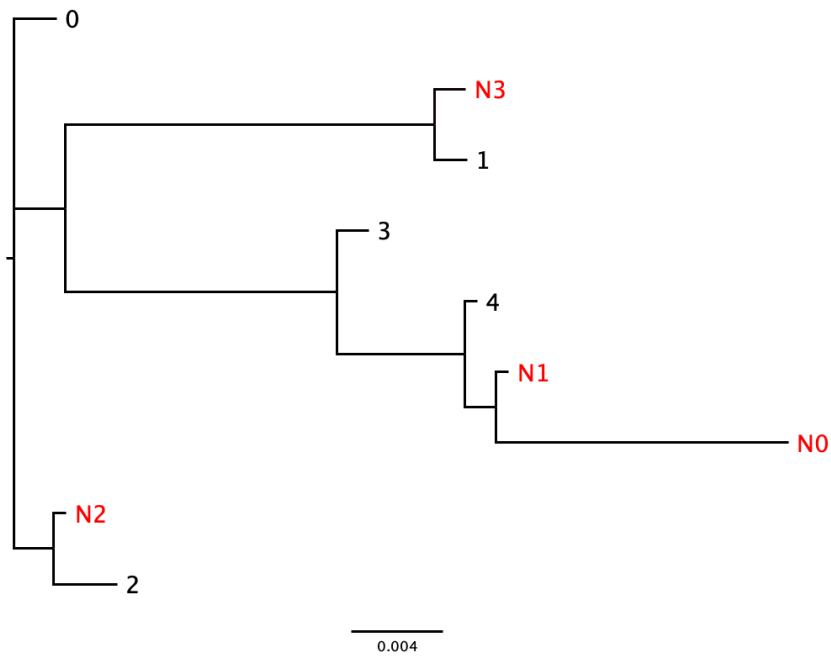

Figure S11: **Comparison of Nanopore and STRONG strain haplotypes for COG0072 from Bin\_846 of the AD time series.** The four Nanopore haplotypes from the optimum run of the EM algorithm are shown in red and 5 STRONG haplotypes in black. The Nanopore haplotypes had relative abundance  $\rho_0 = 0.056$ ,  $\rho_1 = 0.820$ ,  $\rho_2 = 0.091$  and  $\rho_3 = 0.035$ . N0 matched best to 4 with 98.8% nucleotide identity, N1 to 4 with 99.9%, N2 to 0 with 99.7%, N3 to 1 with 99.8%.
